# Supplementary material for: Exploring a Pool‐seq‐only approach for gaining population genomic insights in nonmodel species
Source: PubMed Central journal article supplement (PMC6802065; doi:10.1002/ece3.5646), 2019-09-26
Supplement: ECE3-9-11448-s001.pdf [file ECE3-9-11448-s001.pdf]

1 **Exploring a Pool-seq only approach for gaining population genomic insights in**  
2 **non-model species**

3 Sara Kurland, Christopher W. Wheat, Maria de la Paz Celorio Mancera, Verena E.  
4 Kutschera, Jason Hill, Anastasia Andersson, Carl-Johan Rubin, Leif Andersson, Nils  
5 Ryman, Linda Laikre

6 **Appendix S1: Background on sympatric brown trout population pairs used in the present**  
7 **study**

8 We study four populations (two population pairs) that inhabit small freshwater lakes in a remote,  
9 mountainous area within the Hotagen Nature Reserve, located at c. 700 m elevation in Jämtland  
10 County, central Sweden (Fig. 1). These lakes belong to a long-term monitoring project during  
11 which c. 100 individuals per lake have been collected annually since the mid-1980s and  
12 onwards (Jorde & Ryman, 1996; Laikre, Jorde, & Ryman, 1998; Palm & Ryman, 1999; Palm,  
13 Laikre, Jorde, & Ryman, 2003; Charlier, Palmé, Laikre, Andersson, & Ryman, 2011;  
14 Charlier, Laikre, & Ryman, 2012; Palmé, Laikre, & Ryman, 2013, Andersson et al. 2017a; b).  
15 Typically, 100 fish have been collected annually from each lake (including from Lakes Lilla  
16 Bävervattnet, Stora Bävervattnet, Västra Trollsvattnet and Östra Trollsvattnet that were used for  
17 the present study; Fig 1). All samples have been stored in -80°C freezers since the time of  
18 collection.

19 **Introduced sympatric populations**

20 The introduced pair of populations was released into the Lakes Bävervattnen system, two  
21 interconnected lakes of < 1 km<sup>2</sup> at near 700 m elevation (Fig. 1). A waterfall separates these  
22 lakes from downstream waters inhabited by brown trout, and the lakes were inhabited only by  
23 Arctic charr (*Salvelinus alpinus*) prior to the introduction (Fig. S1). The released individuals  
24 originated from two separate populations showing diverse ecological features and that had been  
25 isolated from each other since the last glaciation (c. 5,000 - 9,000 years ago; Ryman et al.,  
26 1986; Palm & Ryman, 1999). One of the introduced populations (I) is from a hatchery population  
27 frequently used to stock waters in Jämtland County (Bergman, Halvarson, & Larsson, 1989).  
28 This hatchery strain originates from a wild population from Lake Kallsjön, a large lake of c. 155  
29 km<sup>2</sup> at 380 m elevation that belongs to the River Indalsälven catchment, draining into the Baltic  
30 Sea. Fish in the Lake Kallsjön population were large, slow-growing and piscivorous, down-  
31 stream spawners with a presumed capacity for long distance migration (Ryman et al., 1986).  
32 Construction of hydro power plants in the 1940s obstructed spawning and ultimately led to the  
33 wild populations' extinction in the 1980s. Population decline was noticed in the 1940s, and a  
34 hatchery population was created to compensate this loss. This hatchery population was initially  
35 maintained by contribution from wild spawners from River Kallströmmen, but as the wild  
36 population diminished this contribution dwindled, and since the 1950s the hatchery population is  
37 mainly upheld by hatchery reared fish. The other introduced population (II) originates from a  
38 landlocked population inhabiting Lakes Fälpfjälltjärnarna, two tiny lakes of < 1 km<sup>2</sup> at 645 m  
39 elevation. The fish here exhibit traits typical of small-mountain-lake populations; small body size,  
40 maturation at an earlier age and an insect based diet (Ryman et al., 1986).

41 Previous analyses have shown that the Lake Kallsjön and Lakes Fälpfjälltjärnarna populations  
42 exhibit significant allele frequency differences at multiple allozyme loci, particularly so at AGP-2,  
43 where the Lake Kallsjön population was close to fixation for one of the alleles at this locus (the  
44 so-called 100 allele) while in the Lakes Fälpfjälltjärnarna the 100 allele and another allele (called  
45 50) occurred at equal frequencies (Palm & Ryman, 1999). Using the AGP-2 locus, spawners  
46 from each population were chosen to be homozygous for different alleles (100/100 vs. 50/50),  
47 thereby enabling discrimination of lineages after introduction (Palm & Ryman, 1999). According  
48 to hatchery records more than 100 potential breeders of both sexes of the Lake Kallsjön  
49 population were accessible for mating in the fall of 1978, and over 100,000 eggs were  
50 produced. For the Lakes Fälpfjälltjärnarna population, wild spawners were caught during the  
51 spawning season of 1978. The fish were transported to the hatchery, where they were  
52 genotyped and stripped. Of the 102 spawners genotyped, 6 females and 11 males were  
53 identified as homozygous for the 50 allele and used to produce offspring.

54 The introduction of the juveniles was conducted in late July in 1979 by releasing 1,000 fry from  
55 each population to two locations in the Lakes Bävsvattnen system (Fig. S1; Ståhl & Ryman,  
56 1982). The fish in these lakes have been monitored since 1988 primarily using allozymes but  
57 with subsets analyzed for mtDNA, microsatellites, and SNPs (Laikre et al. 1998; Palmé et al.  
58 2013; Andersson et al. 2017a). After the release, 41 individuals could be classified based on  
59 their age and *AGP-2* genotype to either of the two released populations, all of which were used  
60 in the present study. The additional 59 fish used here were “pure” F1 (offspring from matings  
61 within populations as clarified from *AGP-2* genotype) randomly collected out of c. 700 available  
62 fish.

### 63 **Naturally occurring sympatric populations**

64 The Lakes Trollsvattnen system is comprised of a series of tiny interconnected mountain lakes  
65 and tributaries at the northernmost part of the River Indalsälven drainage system. The two main  
66 lakes (Östra and Västra Trollsvattnen) are oligotrophic, c. 0.1-0.17 km<sup>2</sup> in size and with a depth  
67 of mostly 1-2 m.

68 These lakes have been sampled since the 1980s and an initial analysis using 14 polymorphic  
69 allozyme loci revealed significant heterozygote deficiencies in both of the lakes (Jorde &  
70 Ryman, 1996). Further analyses confirmed population genetic structuring in the pooled material  
71 from both lakes ( $F_{IT}=0.042$ ; Palmé et al., 2013), as well as within each of the two lakes  
72 separately ( $F_{IS}=0.038$  and 0.044 for Östra and Västra Trollsvattnen, respectively). STRUCTURE  
73 analysis suggested two populations in the total material as well as within each lake regardless  
74 of assumptions of ancestry and allele-frequency models (Palmé et al., 2013). Considering  
75 individuals assigned to the clusters suggested by STRUCTURE at cut-offs for assignment  
76 between 0.5-0.9 yielded  $F_{ST}$  between 0.1- 0.2 (Palmé et al., 2013; Andersson et al., 2017a).  
77 However, in an analysis of 3,093 SNPs from a subset of the initially studied individuals, genetic  
78 differentiation is a fraction of that detected by allozymes ( $F_{ST} = 0.03$ ; Andersson et al., 2017a).  
79 Based on analyses of phenotypic traits and diet, the populations in Lakes Trollsvattnen give no  
80 indication of trophic polymorphism or ecological niche separation (Andersson et al., 2017b). The  
81 fish used in the present study were a randomly chosen sample from c. 2,000 individuals with an

82 assignment probability of  $\geq 0.8$  to either of the two genetic clusters based on allozyme genotype  
83 (see Andersson et al., 2017a for more details).

84

85 **Figure S1** Schematic illustration of sympatric populations I (hatchery source) and II (lake  
86 resident source), and their introduction to Lakes Bävervattnen.

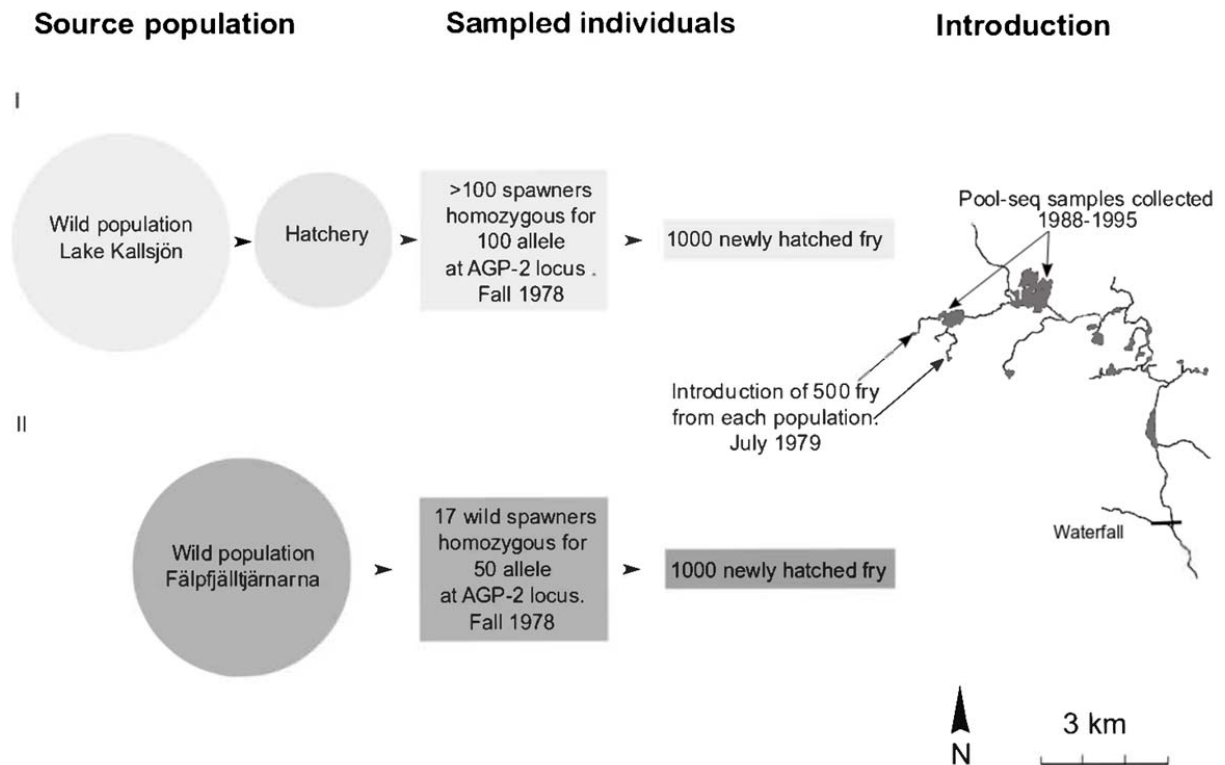

87

88 **Literature cited**

- 89 Andersson, A., Jansson, E., Wennerström, L., Chiriboga, F., Arnyasi, M., Kent, M. P., &  
90 Laikre, L. (2017a) Complex genetic diversity patterns of cryptic, sympatric brown trout  
91 (*Salmo trutta*) populations in tiny mountain lakes. *Conservation Genetics*, 18(5), 1213–  
92 1227. <https://doi.org/10.1007/s10592-017-0972-4>
- 93 Andersson, A., Johansson, F., Sundbom, M., Ryman, N., & Laikre, L. (2017b). Lack of  
94 trophic polymorphism despite substantial genetic differentiation in sympatric brown trout  
95 (*Salmo trutta*) populations. *Ecology of Freshwater Fish*, 26, 643-652.  
96 <https://doi.org/10.1111/eff.12308>
- 97 Bergman, W., Halvarson, J. & Larsson, M. 1989. Öringstammar i Sverige:  
98 Åtgärdsstudier för kompensation av fiskeskador, delrapport 2. (In Swedish). FUD  
99 Vattenfall, Vällingby.
- 100 Carruthers, M., Yurchenko, A. A., Augley, J. J., Adams, C. E., Herzyk, P., & Elmer, K. R.  
101 (2018). De novo transcriptome assembly, annotation and comparison of four ecological  
102 and evolutionary model salmonid fish species. *BMC Genomics*, 19:32, 1–17.  
103 <https://doi.org/10.1186/s12864-017-4379-x>
- 104 Charlier, J., Laikre, L., & Ryman, N. (2012). Genetic monitoring reveals temporal  
105 stability over 30 years in a small, lake-resident brown trout population. *Heredity*, 109(4),  
106 246–253. <https://doi.org/10.1038/hdy.2012.36>
- 107 Charlier, J., Palmé, A., Laikre, L., Andersson, J., & Ryman, N. (2011). Census (NC) and  
108 genetically effective (Ne) population size in a lake-resident population of brown trout  
109 *Salmo trutta*. *Journal of Fish Biology*, 79(7), 2074–2082. <https://doi.org/10.1111/j.1095-8649.2011.03124.x>
- 111 Jorde, P., & Ryman, N. (1996). Demographic Genetics of Brown Trout (*Salmo trutta*)  
112 and Estimation of Effective Population Size from Temporal Change of Allele  
113 Frequencies. *Genetics Society of America*, (143), 1396–1381.
- 114 Laikre, L., Jorde, P. E., & Ryman, N. (1998). Temporal Change of Mitochondrial DNA  
115 Haplotype Frequencies and Female Effective Size in a Brown Trout (*Salmo trutta*)  
116 Population. *Society for the Study of Evolution*, 52(3), 910–915.
- 117 Palm, S., & Ryman, N. (1999). Genetic basis of phenotypic differences between  
118 transplanted stocks of brown trout. *Ecology of Freshwater Fish*, 8(3), 169–180.
- 119 Palm, S., Laikre, L., Jorde, P., & Ryman, N. (2003). Effective population size and  
120 temporal genetic change in stream resident brown trout (*Salmo trutta*, L.). *Conservation*  
121 *Genetics*, 4(3), 249–264. <http://dx.doi.org/10.1023/A%3A1024064913094>

- 122 Palmé, A., Laikre, L., & Ryman, N. (2013). Monitoring reveals two genetically distinct  
123 brown trout populations remaining in stable sympatry over 20 years in tiny mountain  
124 lakes. *Conservation Genetics*, 14(4), 795–808. [https://doi.org/10.1007/s10592-013-](https://doi.org/10.1007/s10592-013-0475-x)  
125 0475-x
- 126 Ryman, N., Öhman, R., Ståhl, G., Nilsson, A, Lagercrantz, U. & Herlitz, A. 1986.  
127 Genetisk variation hos laxartad fisk - en snabbt försvinnande naturresurs: Information  
128 om genetisk forskning i Jämtland [Genetic variation in salmonid fishes - a rapidly  
129 declining natural resource: information on the scientific work in the lakes Bavervattnen  
130 area in Jämtland County, central Sweden] (in Swedish). Stockholm: Resta Grafiska AB.
- 131 Ståhl, G., & Ryman, N. (1982). Simple Mendelian inheritance at a locus coding for a –  
132 glycerophosphate dehydrogenase in brown trout (*Salmo trutta*). *Hereditas*, 96, 313-315.  
133 <https://doi.org/10.1111/j.1601-5223.1982.tb00865.x>
